# Supplementary material
Source: PubMed Central journal article supplement (PMC6284214)
Supplement: blood834598-suppl1.pdf [file blood834598-suppl1.pdf]

## Supplemental Methods:

Antigen-C3 capture ELISA assay: Antigen-specific monoclonal antibodies (mouse anti human PF4/heparin; KKO or mouse anti-protamine/heparin; ADA at 2  $\mu\text{g}/\text{mL}$ )<sup>28-30</sup> were incubated overnight on a microtiter plate (in phosphate buffered saline, PBS) followed by washing and blocking with 1% bovine serum albumin (BSA) in PBS for 2 hours. To activate complement, plasma was incubated with buffer or heparin alone or PF4  $\pm$  heparin or PRT  $\pm$  heparin at 37°C for 1 hour (hr) followed by addition of 10 mM ethylenediaminetetraacetic acid (EDTA) to inhibit further complement generation. Unless specified antigen concentrations were 25  $\mu\text{g}/\text{mL}$  (PF4) and 0.25 U/mL (heparin) for KKO coated plates and 125  $\mu\text{g}/\text{mL}$  (PRT) and 6 U/mL (heparin) for ADA coated plates. Next, plasma containing antigen fixed by complement activation fragments was added to the capture plate for 1hr followed by serial washes. Complement-coated antigen was detected using a biotinylated anti-C3c antibody (recognizes C3 and all C3c-containing fragments of C3, including iC3b; Quidel Corporation, San Diego, CA) followed by colorimetric detection as previously described.<sup>6</sup> To circumvent day to day variation in longitudinal or cohort assays involving the antigen-C3 capture ELISA assay, we used fresh plasma from one healthy donor (Donor 1) as an internal control in each assay and normalized data to readings obtained from this donor.

## Supplemental Table: 1

**Supplemental Table 1:** Table shows the fold changes in the levels of various complement and complement regulatory proteins in the high ( n=3)/ intermediate (n=2) Vs low ( n=3) complement responders.

| Primary Protein Name | Protein Description                      | # quantified peptides | Foldchange High/ Intermediate vs. Low | p-value (t-test) High/ Intermediate vs. Low |
|----------------------|------------------------------------------|-----------------------|---------------------------------------|---------------------------------------------|
| IGHM_HUMAN           | Ig mu chain C region                     | 40                    | <b>4.08</b>                           | <b>0.001</b>                                |
| C1QB_HUMAN           | Complement C1q subcomponent subunit B    | 10                    | <b>1.13</b>                           | <b>0.01</b>                                 |
| FHR4_HUMAN           | Complement factor H-related protein 4    | 1                     | <b>2.07</b>                           | <b>0.031</b>                                |
| C1QA_HUMAN           | Complement C1q subcomponent subunit A    | 4                     | <b>1.12</b>                           | <b>0.033</b>                                |
| CFAD_HUMAN           | Complement factor D                      | 4                     | <b>-1.19</b>                          | <b>0.034</b>                                |
| MBL2_HUMAN           | Mannose-binding protein C                | 4                     | -2.13                                 | 0.054                                       |
| CO9_HUMAN            | Complement component C9                  | 22                    | 1.49                                  | 0.131                                       |
| C1RL_HUMAN           | Complement C1r subcomponent-like protein | 6                     | 1.53                                  | 0.133                                       |
| FHR1_HUMAN           | Complement factor H-related protein 1    | 7                     | 2.69                                  | 0.134                                       |
| FCN3_HUMAN           | Ficolin-3                                | 8                     | -1.29                                 | 0.139                                       |
| IC1_HUMAN            | Plasma protease C1 inhibitor             | 29                    | 1.16                                  | 0.153                                       |
| C1QC_HUMAN           | Complement C1q subcomponent subunit C    | 12                    | 1.08                                  | 0.165                                       |
| CO4A_HUMAN           | Complement C4-A                          | 4                     | 2.25                                  | 0.208                                       |
| CO7_HUMAN            | Complement component C7                  | 29                    | -1.13                                 | 0.21                                        |
| CO2_HUMAN            | Complement C2                            | 23                    | -1.13                                 | 0.229                                       |
| CFAI_HUMAN           | Complement factor I                      | 25                    | -1.15                                 | 0.24                                        |
| CO4B_HUMAN           | Complement C4-B                          | 138                   | 1.18                                  | 0.269                                       |
| C1S_HUMAN            | Complement C1s subcomponent              | 24                    | 1.05                                  | 0.36                                        |
| CFAH_HUMAN           | Complement factor H                      | 108                   | -1.07                                 | 0.392                                       |
| C1R_HUMAN            | Complement C1r subcomponent              | 33                    | 1.06                                  | 0.438                                       |
| CO8G_HUMAN           | Complement component C8 gamma chain      | 12                    | -1.11                                 | 0.438                                       |
| CO8B_HUMAN           | Complement component C8 beta chain       | 25                    | -1.06                                 | 0.442                                       |
| MASP1_HUMAN          | Mannan-binding lectin serine protease 1  | 7                     | -1.10                                 | 0.542                                       |
| CO3_HUMAN            | Complement C3                            | 235                   | -1.07                                 | 0.603                                       |
| FHR5_HUMAN           | Complement factor H-related protein 5    | 3                     | -1.11                                 | 0.603                                       |
| FHR2_HUMAN           | Complement factor H-related protein 2    | 3                     | 1.14                                  | 0.606                                       |
| MASP2_HUMAN          | Mannan-binding lectin serine protease 2  | 1                     | -1.17                                 | 0.647                                       |
| CLUS_HUMAN           | Clusterin                                | 24                    | 1.05                                  | 0.664                                       |
| VTNC_HUMAN           | Vitronectin                              | 24                    | -1.06                                 | 0.692                                       |
| FCN2_HUMAN           | Ficolin-2                                | 4                     | -1.11                                 | 0.73                                        |
| CO8A_HUMAN           | Complement component C8 alpha chain      | 23                    | -1.03                                 | 0.82                                        |
| CFAB_HUMAN           | Complement factor B                      | 49                    | 1.03                                  | 0.873                                       |
| CO5_HUMAN            | Complement C5                            | 88                    | -1.00                                 | 1                                           |
| CO6_HUMAN            | Complement component C6                  | 34                    | 1.01                                  | 1                                           |

## Supplemental Figure 1

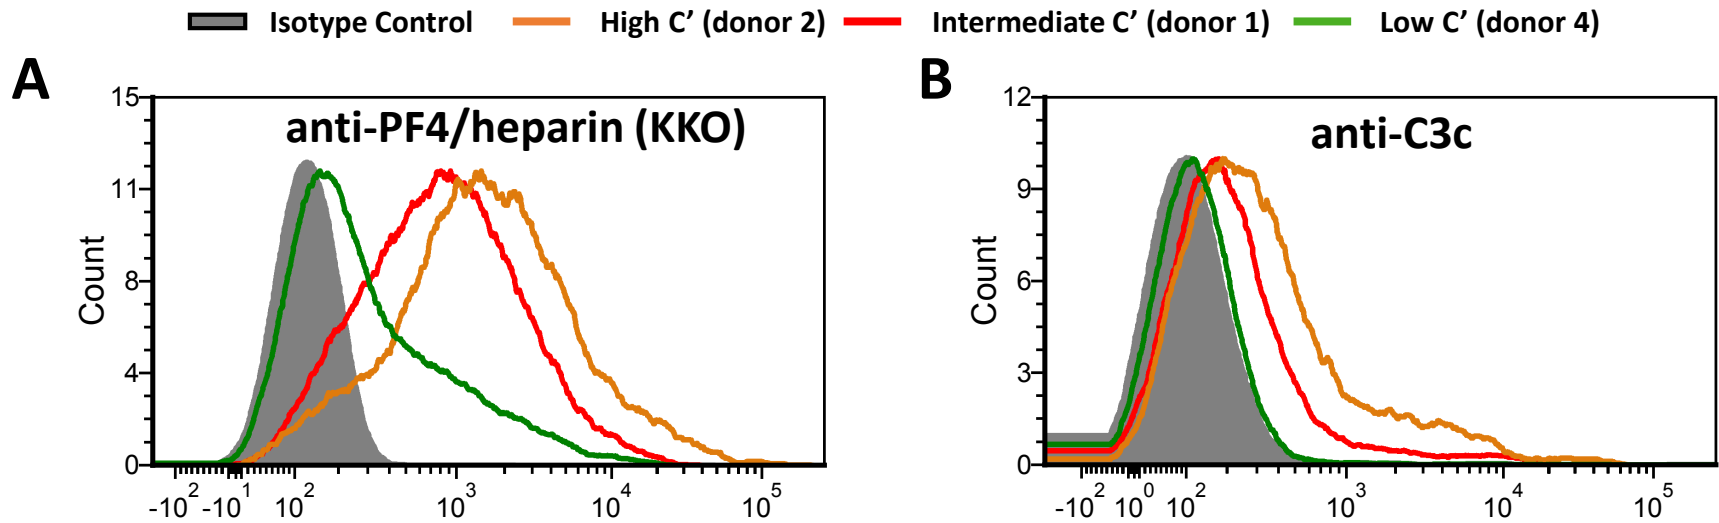

**Figure S1: Complement activation and PF4/heparin binding to B cells in healthy donors.** whole blood from “high”, “intermediate” and “low” complement (C') response type healthy donors from Figure 1A/B was incubated with PF4 and heparin and binding of PF4/heparin and C3c to B cells was determined by flow cytometry as described in the methods section. Histogram shows the binding of (A) anti-PF4/heparin (KKO) or (B) C3c on the B cells for the three donors. Filled histogram show the isotype staining.

## Supplemental Figure 2

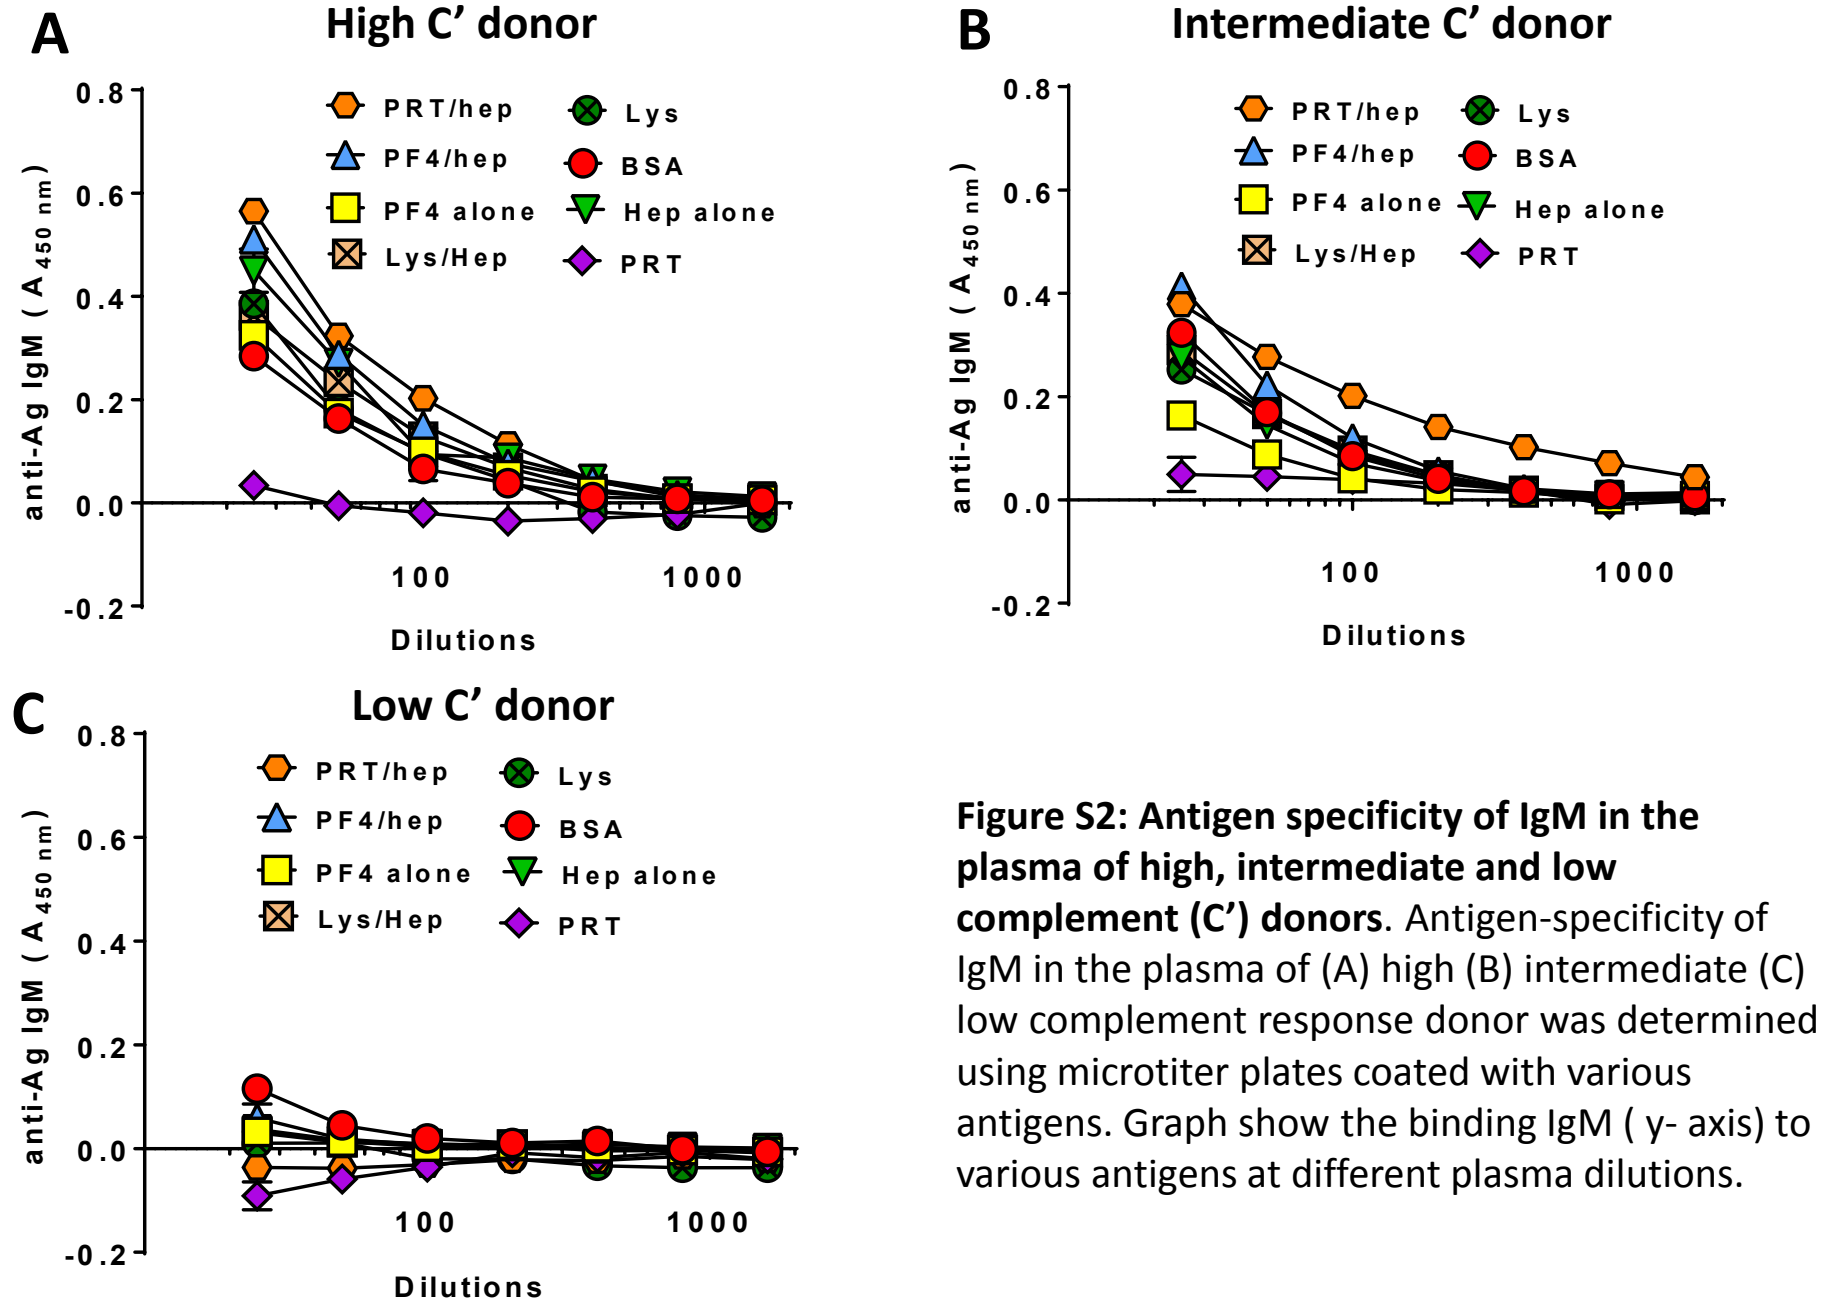

### Supplemental Figure 3

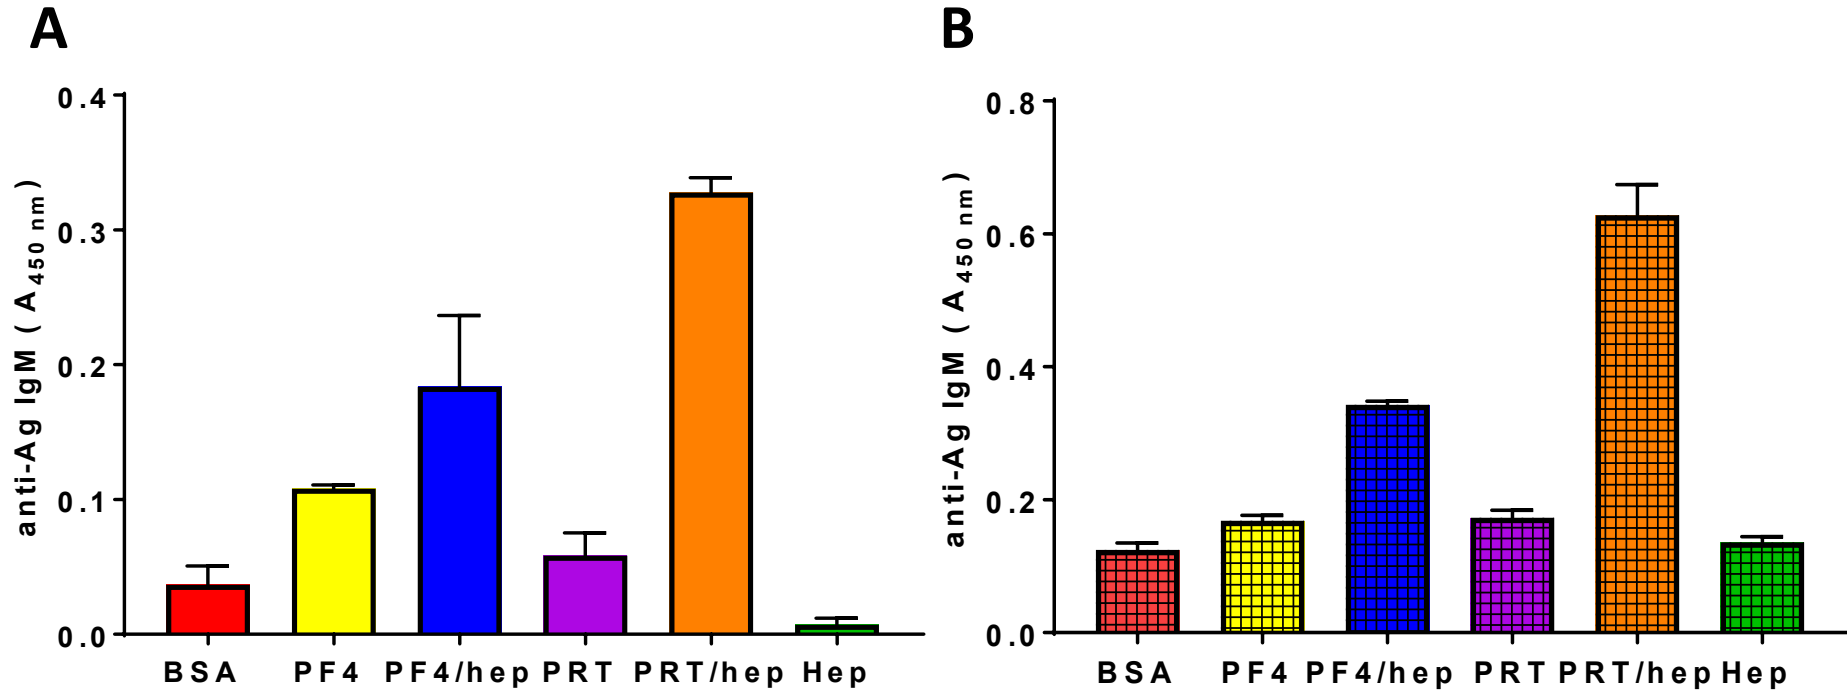

**Figure S3: Polyreactivity of PF4/heparin binding IgM.** (A) PF4/heparin binding IgM were isolated from the pooled healthy donor IgM by using a PF4/heparin column. Polyreactivity of these isolated PF4/heparin binding IgM (2  $\mu\text{g}/\text{mL}$ ) was determined by using microtiter plates coated with various antigens. Graph show the binding of IgM (y-axis) to various antigens. (B) Antigen binding specificity of unfractionated IgM (pooled healthy donor IgM; 20  $\mu\text{g}/\text{mL}$ ) was determined by using microtiter plates coated with various antigens. Graph show the binding of IgM (y-axis) to various antigens.

## Supplemental Figure 4

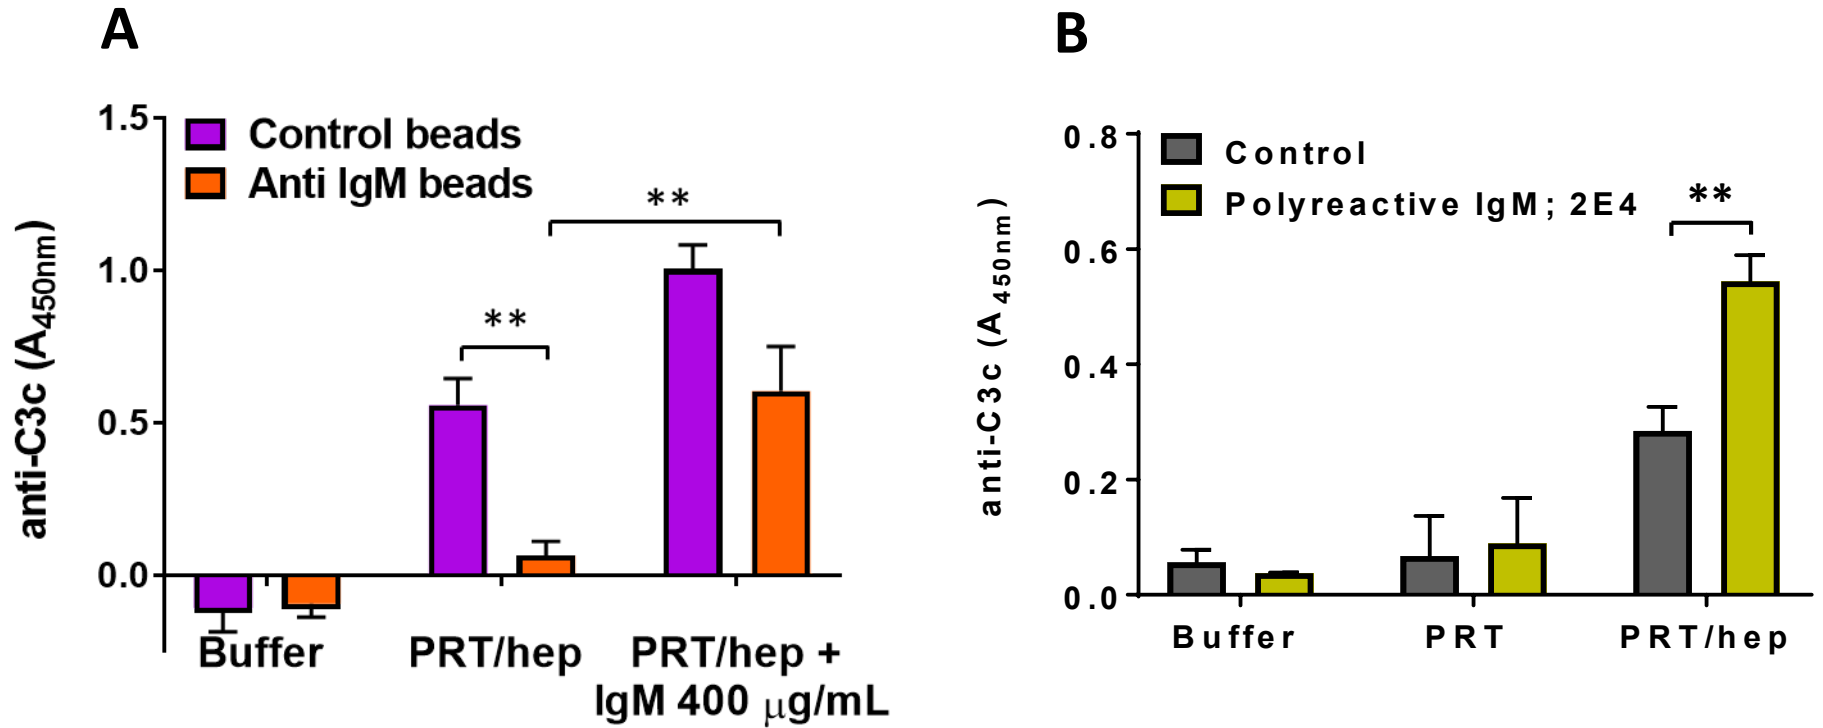

**Figure S4: Polyreactive IgM mediates complement activation by PRT/heparin complexes.** (A) Plasma of an “intermediate” donor phenotype was treated with anti IgM or control beads, followed by addition of buffer, PRT(125  $\mu$ g/mL)/heparin (6 U/mL) or PRT/heparin + 400  $\mu$ g/mL IgM and complement activation was measured by antigen-C3c capture ELISA assay on a mouse anti PRT/heparin antibody (ADA) coated plate. Graph shows complement activation (y-axis) in control or IgM depleted plasma (x-axis) \*\*  $p < 0.0001$  (B) Complement activation by polyreactive monoclonal IgM, 2E4, in the plasma of an “intermediate” donor phenotype in response to buffer and PRT (125  $\mu$ g/mL)  $\pm$  heparin (6 U/mL) was measured by antigen-C3c capture ELISA assay. Graph shows complement activation (y-axis) in different incubation conditions with and without added polyreactive monoclonal IgM (10  $\mu$ g/mL, 2E4). \*\*  $p < 0.0001$ , relative to no polyreactive IgM added.

## Supplemental Figure 5

▨ Buffer Control    ■ PF4    ■ PF4/heparin    ■ PF4/heparin + EDTA    ■ PF4/heparin + EGTA    ■ PF4/heparin + EGTA + MgCl<sub>2</sub>

### A

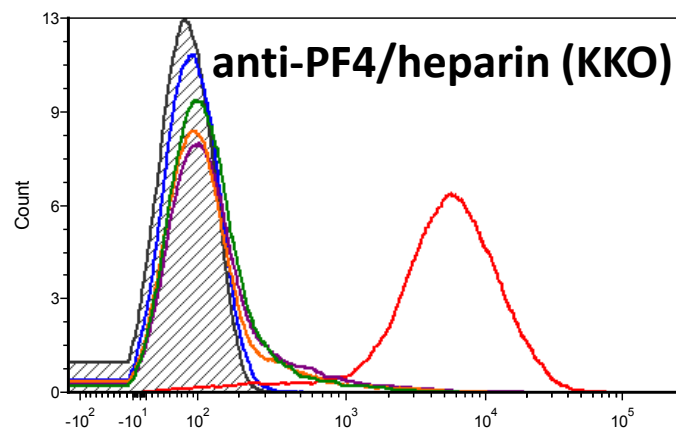

### B

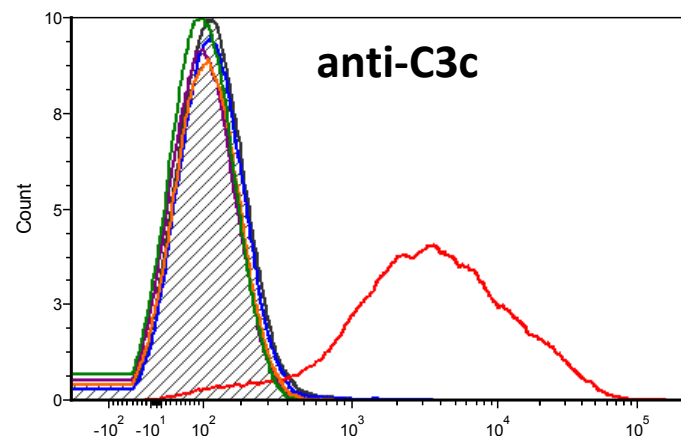

**Figure S5: PF4/heparin complexes do not activate complement via alternative pathway:** Whole blood from a healthy donor was incubated with or without EDTA (10 mM) or EGTA (10 mM)  $\pm$  MgCl<sub>2</sub> (10 mM) before incubating with buffer or antigen (PF4; 25 $\mu$ g/mL  $\pm$  heparin; 0.25 U/mL) and binding of PF4/heparin and C3c to B cells was determined by flow cytometry as described in the methods section. Histogram shows the binding of (A) anti-PF4/heparin (KKO) or (B) anti-C3c to B cells in various incubation conditions.

## Supplemental Figure 6

▨ Buffer Control    — PF4/heparin    — Ms IgG 1 + PF4/heparin    — Anti-MBL + PF4/heparin    — Anti-C1 q + PF4/heparin

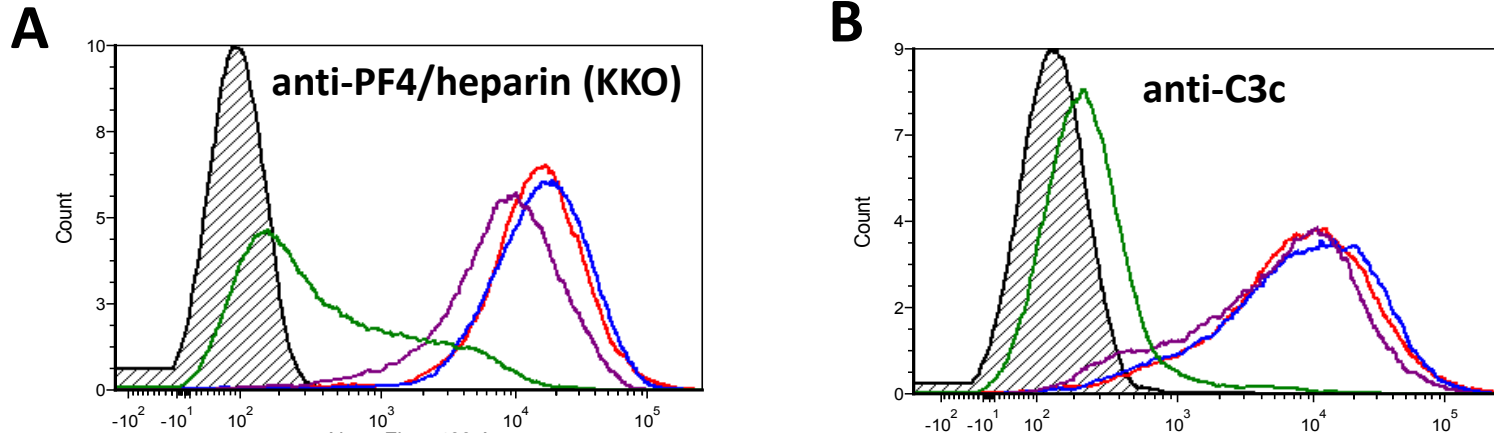

**Figure S6: PF4/heparin complexes activate complement by classical pathway .** Whole blood from a healthy donor was incubated with 100  $\mu\text{g}/\text{mL}$  of mouse IgG1 or anti-MBL antibody or anti-C1q antibody before incubating with PF4/heparin. Binding of PF4/heparin and C3c to B cells was determined by flow cytometry as described in the methods section. Histogram shows the binding of (A) anti- PF4/heparin (KKO) or (B) anti-C3c to B cells in various incubation conditions.
